# Supplementary material for: Carbazole dendrimers containing oligoarylfluorene cores as solution-processed hole-transporting non-doped emitters for efficient pure red, green, blue and white organic light-emitting diodes
Source: Royal Society of Chemistry journal article supplement (doi:10.1039/c4py00228h), 2014-01-01

## Supporting Information

### **Carbazole Dendrimers Containing Oligoarylfluorene Cores as Solution-Processed Hole-Transporting Non-Doped Emitters for Efficient Pure Red, Green, Blue and White Organic Light-Emitting Diodes**

T. Sudyoadsuk,<sup>a</sup> P. Moonsin,<sup>a</sup> N. Prachumrak,<sup>b</sup> S. Namuangruk,<sup>c</sup> S. Jungsuttiwong,<sup>a</sup> T. Keawin<sup>a</sup> and V. Promarak<sup>b,c,\*</sup>

<sup>a</sup> *Department of Chemistry, Faculty of Science, Ubon Ratchathani University, Ubon Ratchathani, 34190, Thailand*

<sup>b</sup> *School of Chemistry and Center of Excellence for Innovation in Chemistry, Institute of Science, Suranaree University of Technology, Maung District, Nakhon Ratchasima, 30000, Thailand*

<sup>c</sup> *National Nanotechnology Center (NANOTEC), 130 Thailand Science Park, Klong Luang, Pathumthani, 12120, Thailand*

<sup>d</sup> *PTT Group Frontier Research Center, PTT Public Company Limited, 555 Vibhavadi Rangsit Road, Chatuchak, Bangkok 10900, Thailand*

\*Fax: 66 4422 4518; Tel: 66 4422 4277 E-mail: [pvinich@sut.ac.th](mailto:pvinich@sut.ac.th)

#### **Contents**

|                                                        |          |
|--------------------------------------------------------|----------|
| <b>1. Chemical quantum calculation results</b>         | <b>2</b> |
| <b>3. OLED results</b>                                 | <b>4</b> |
| <b>4. <sup>1</sup>H and <sup>13</sup>C NMR spectra</b> | <b>5</b> |

## 1. Chemical quantum calculation results

- dodexyl and *tert*-butyl groups were adopted by methyl group for all structures
- All calculations were performed by Gaussian 09 code
- CH<sub>2</sub>Cl<sub>2</sub> solvent by C-PCM model was applied for all calculations
- Geometry optimizations were done by B3LYP/6-31G(d) method

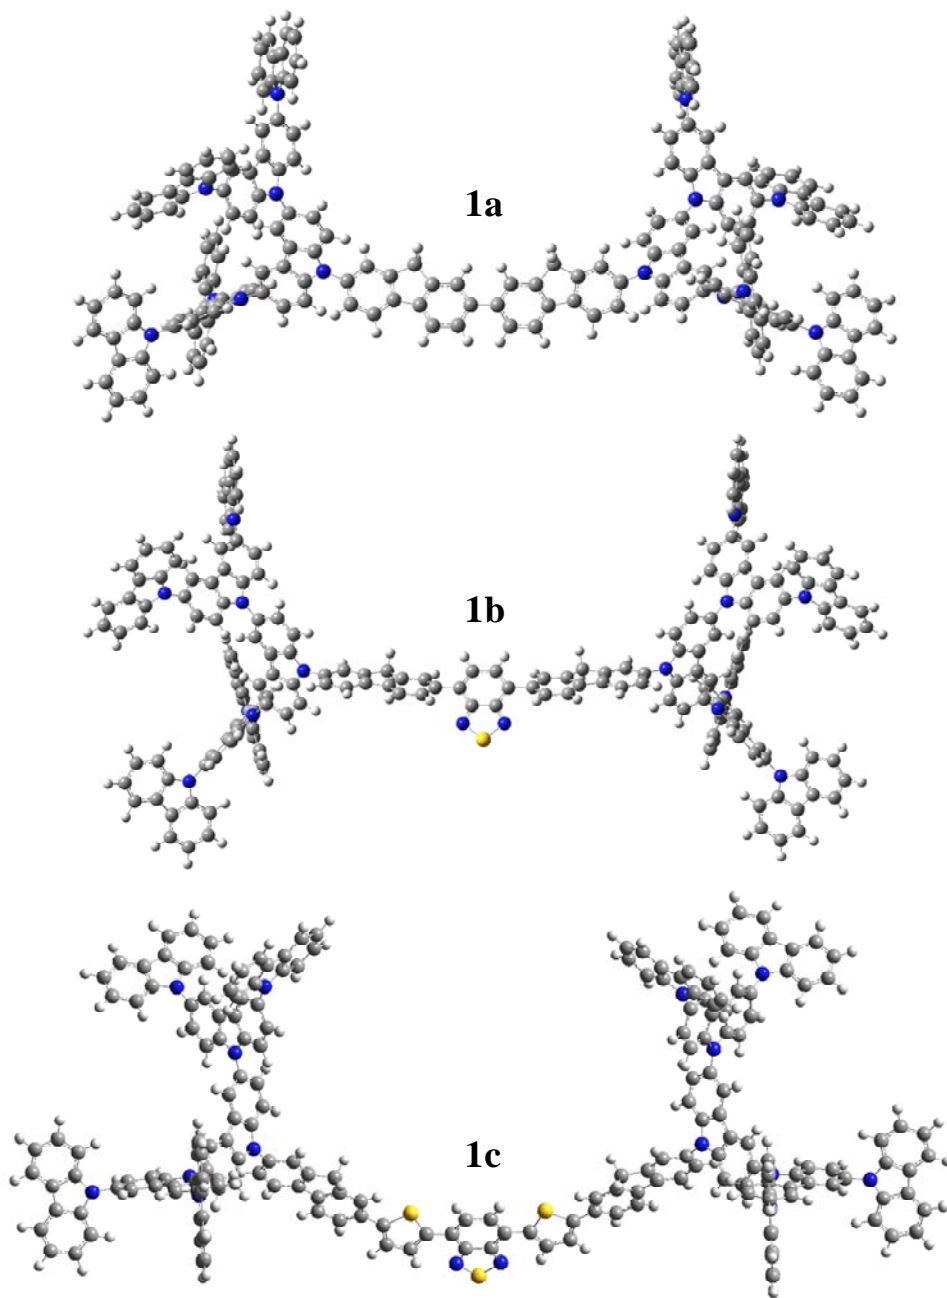

**Fig. S1** The optimized structure of the dendrimers calculated by C-PCM model.

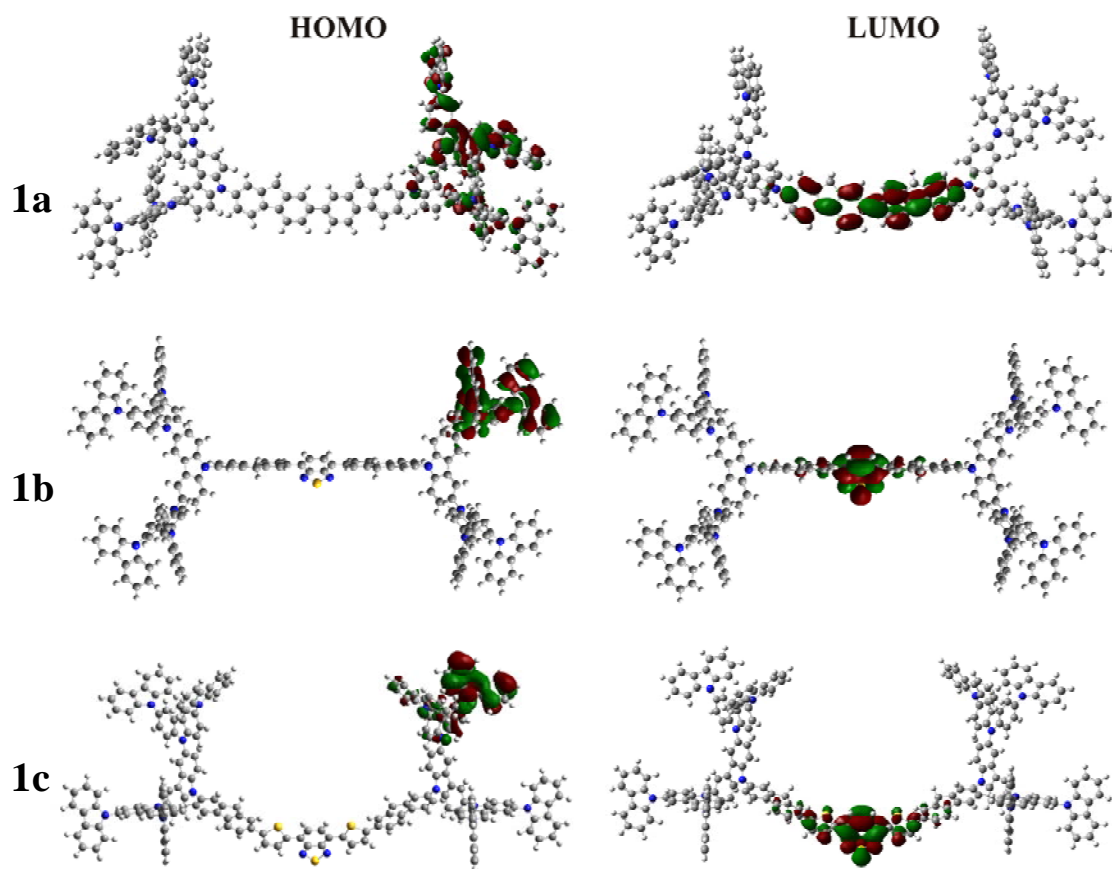

**Fig. S2** HOMO (left) and LUMO (right) of the dendrimers calculated by B3LYP/6-31G(d) in  $\text{CH}_2\text{Cl}_2$  solvent.

**Table S1** The calculated HOMO, LUMO and HOMO-LUMO energy gap ( $\Delta_{\text{H-L}}$ ) of the studied compounds by TDDFT/B3LYP/6-31G(d) in  $\text{CH}_2\text{Cl}_2$  solvent.

| Compounds | HOMO  | LUMO  | <sup>a</sup> $\Delta_{\text{H-L}}$ | $E_{\text{g}}^{\text{cal}}$ (eV) |
|-----------|-------|-------|------------------------------------|----------------------------------|
| <b>1a</b> | -5.28 | -1.62 | 3.66                               | 3.15                             |
| <b>1b</b> | -5.34 | -2.57 | 2.77                               | 2.78                             |
| <b>1c</b> | -5.18 | -2.81 | 2.37                               | 2.21                             |

<sup>a</sup>  $\Delta_{\text{H-L}}$  is the calculated  $E_{\text{g}}$  estimated from the excitation energy of single electron from HOMO to LUMO (in practical is the energy difference between HOMO and LUMO)

## 2. OLED results

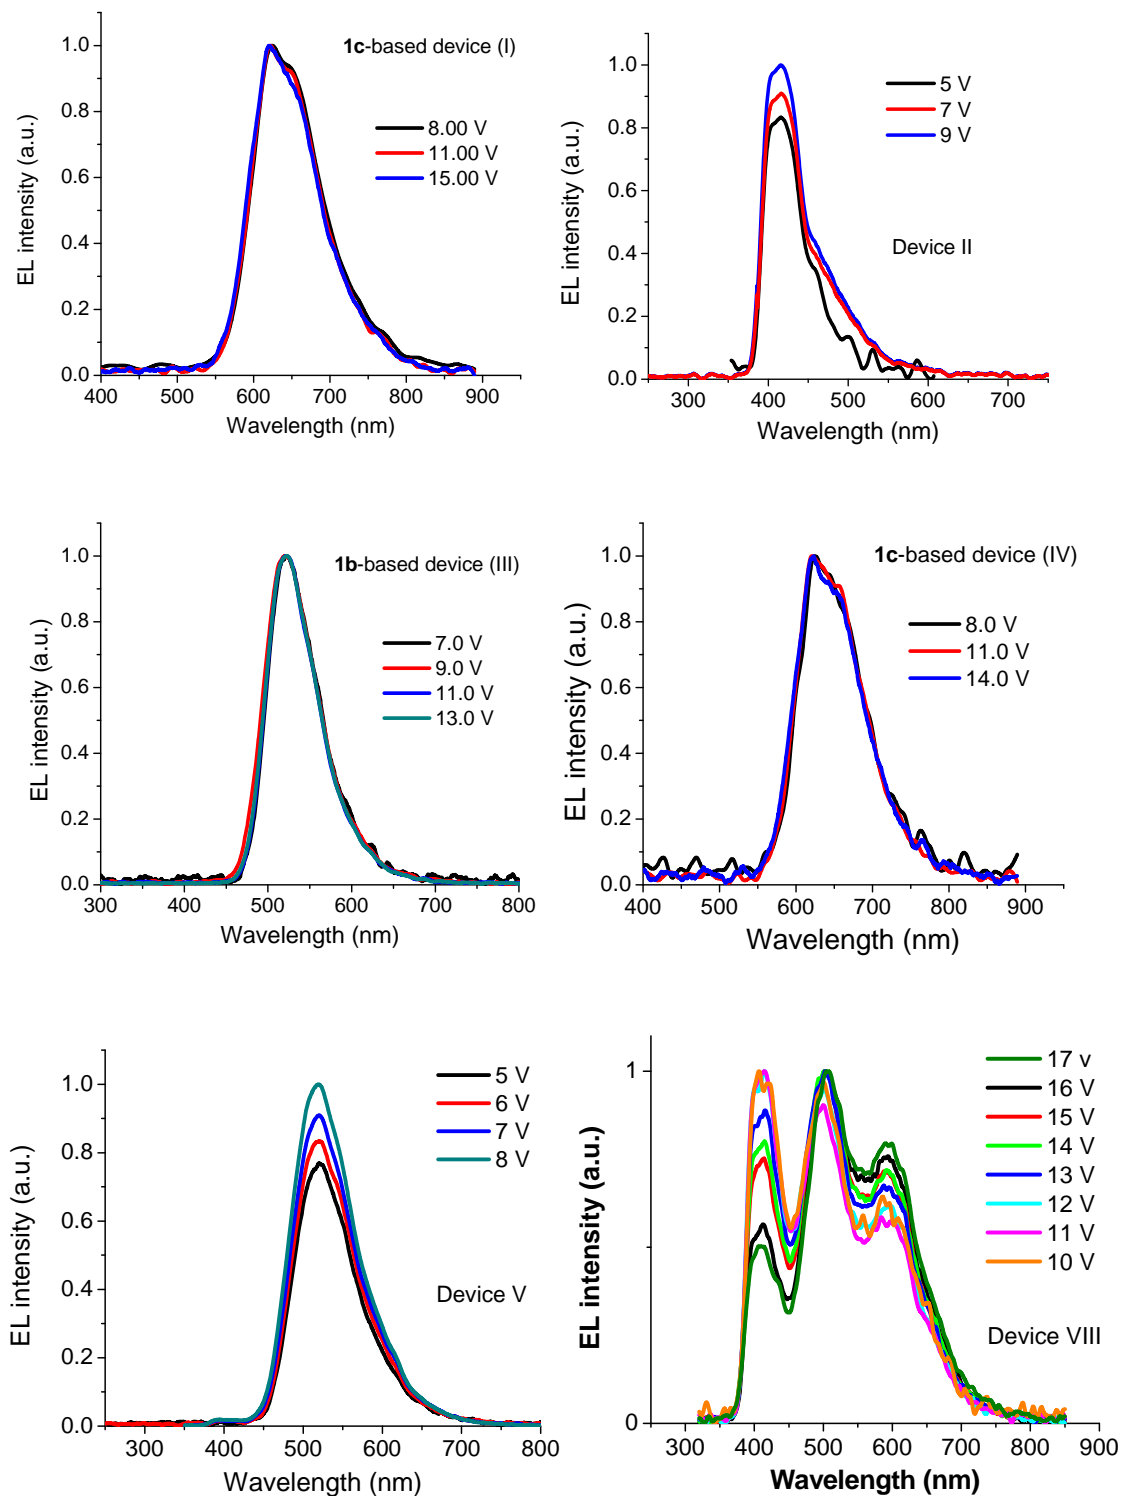

**Fig. S3** Normalized EL spectra at different applied voltages of the OLEDs.

3. <sup>1</sup>H and <sup>13</sup>C NMR spectra  
Compound 3

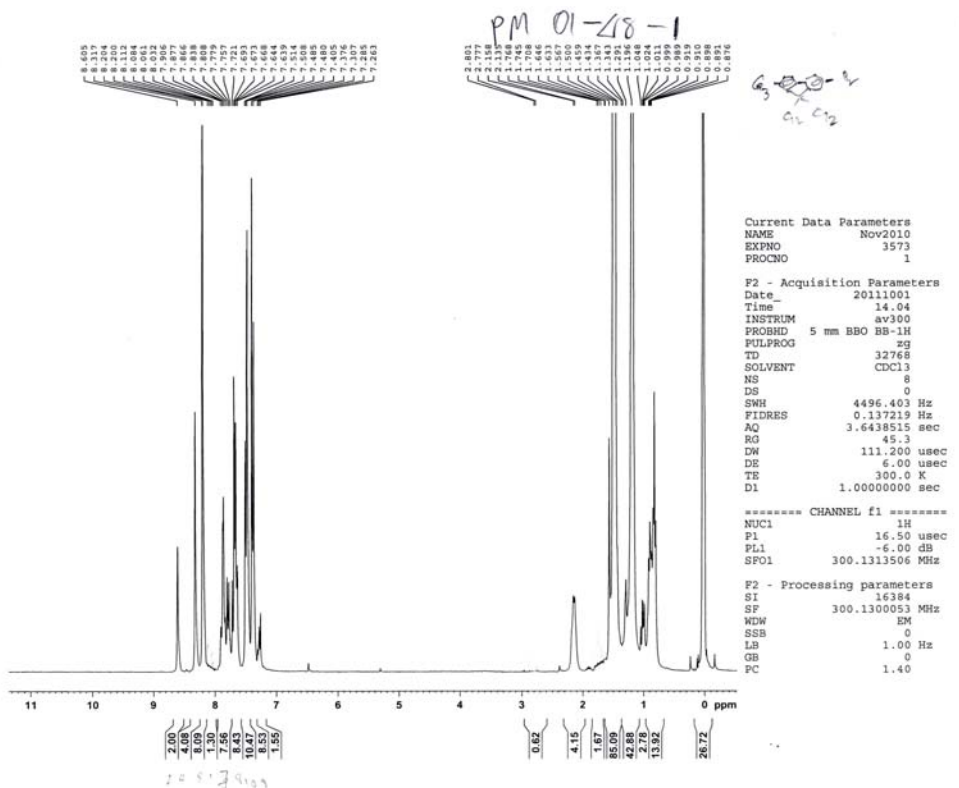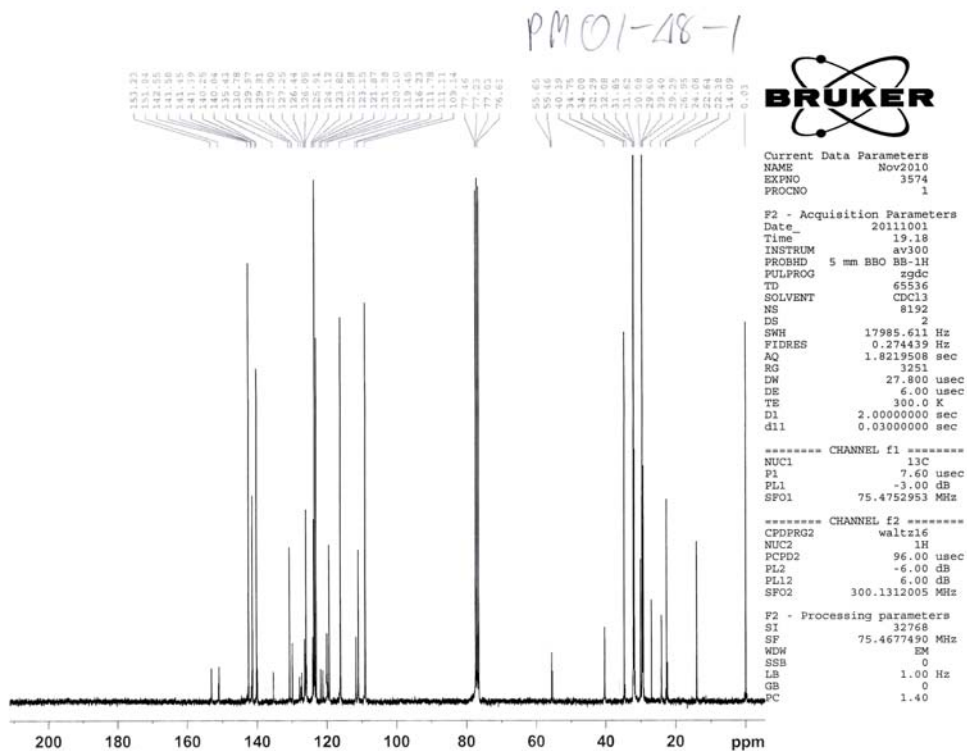



# Compound 6

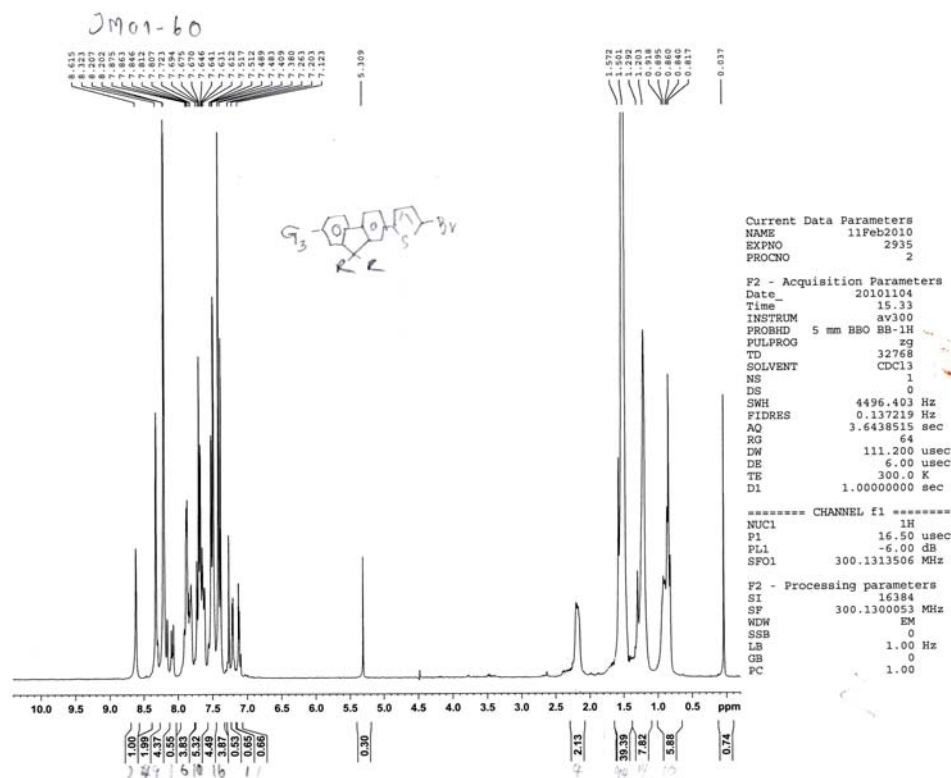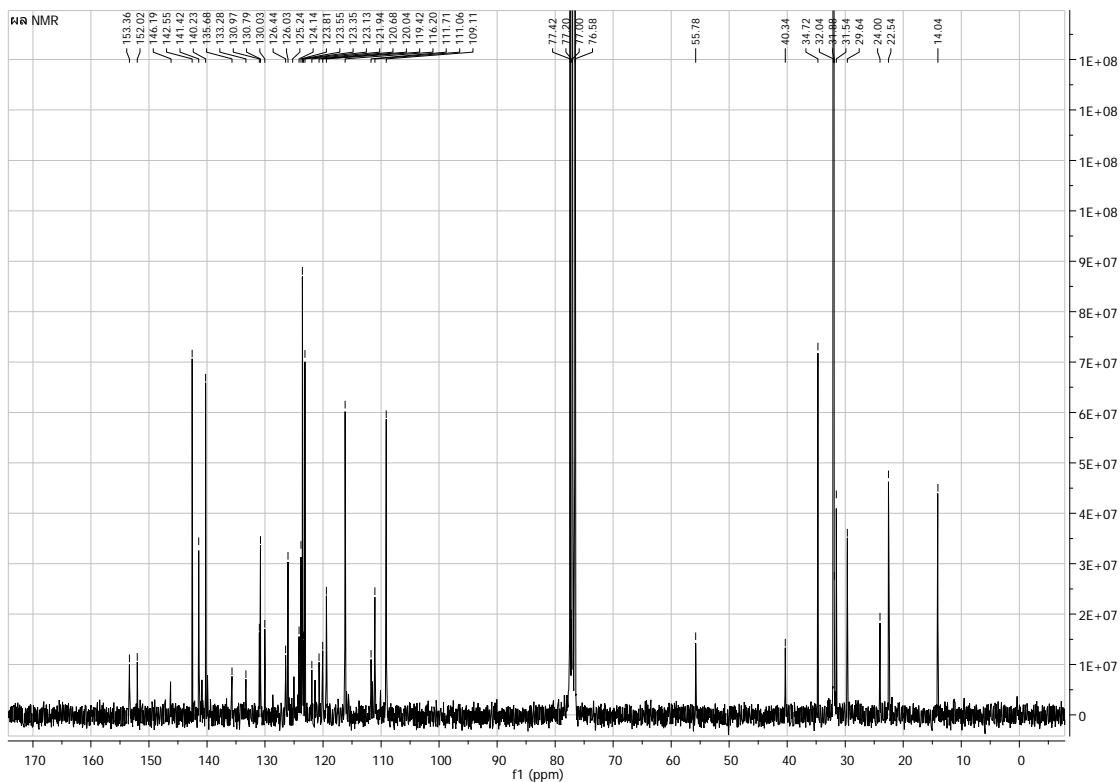

Compound 1a

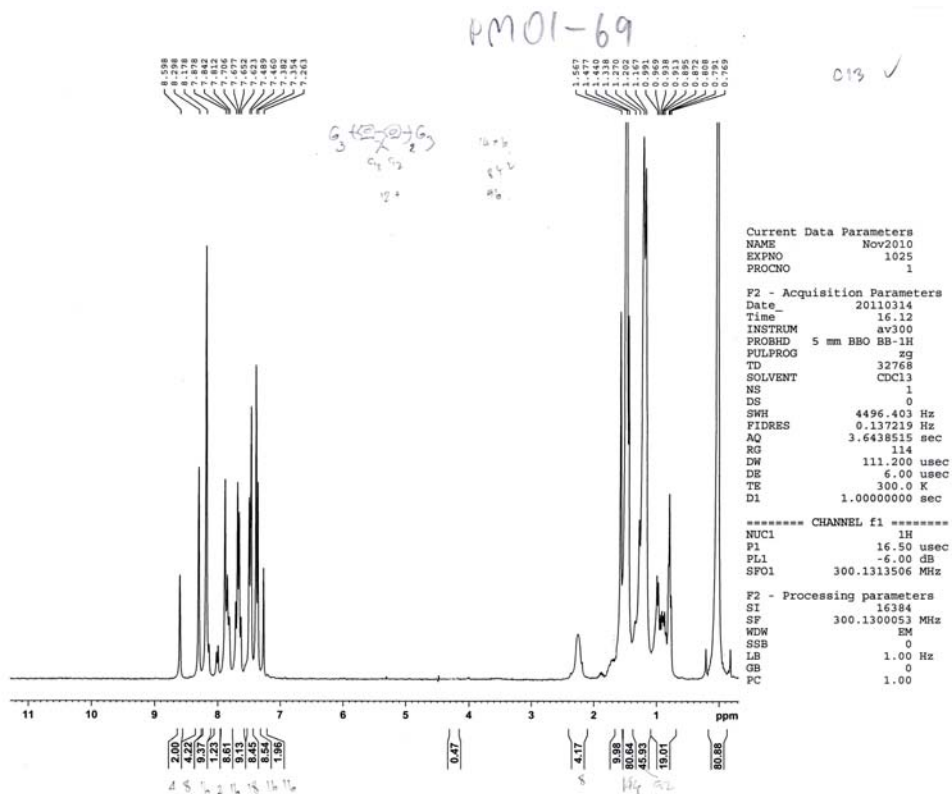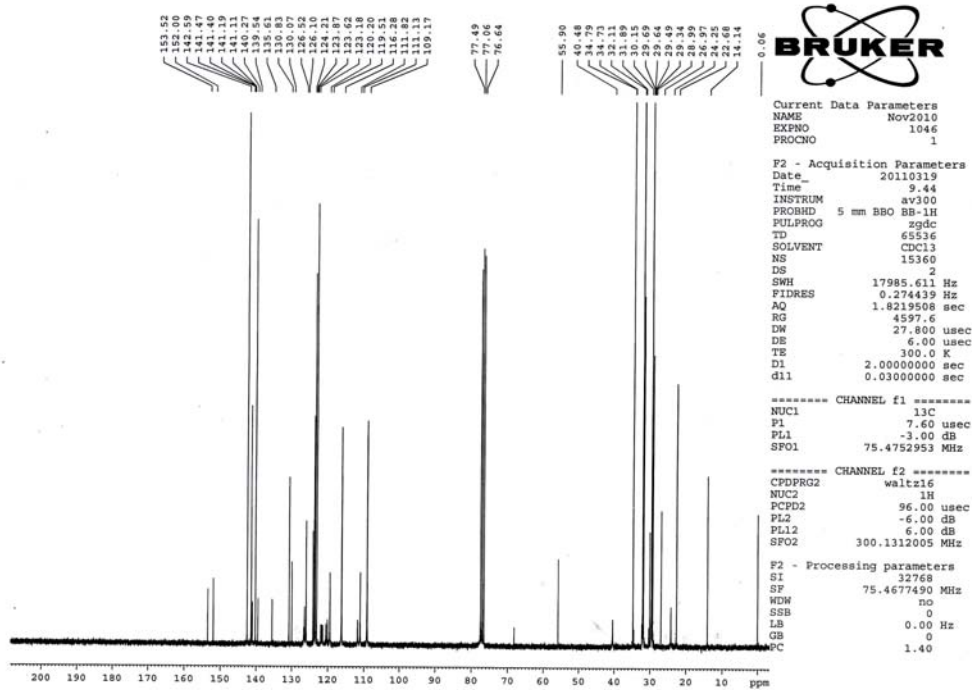



Compound 1b

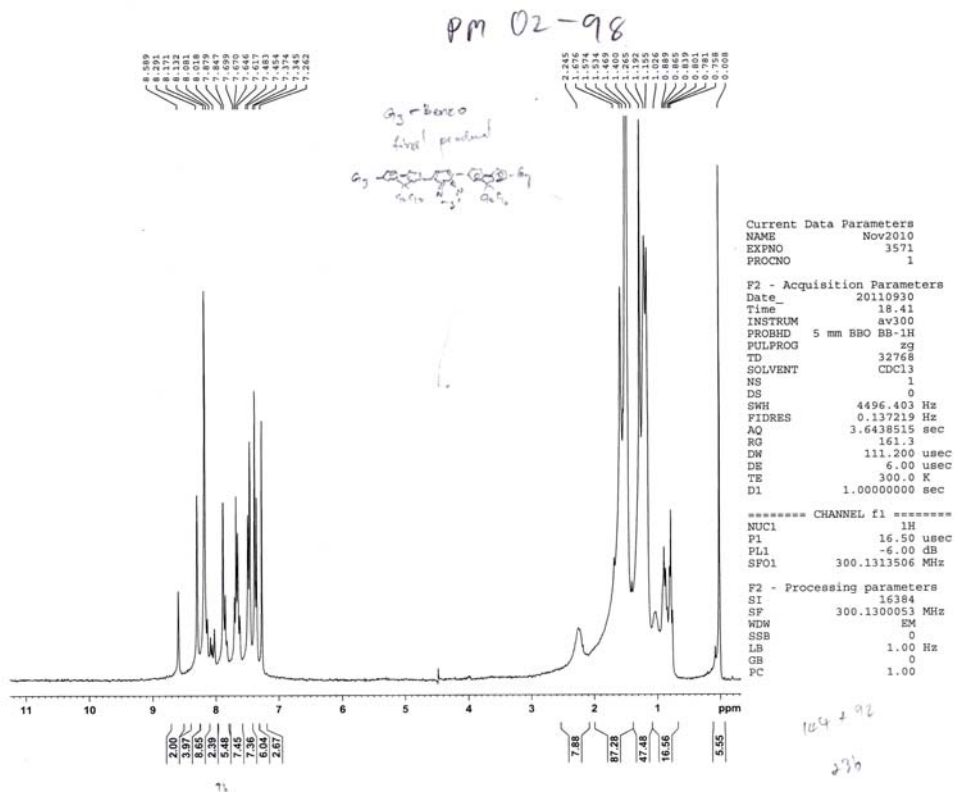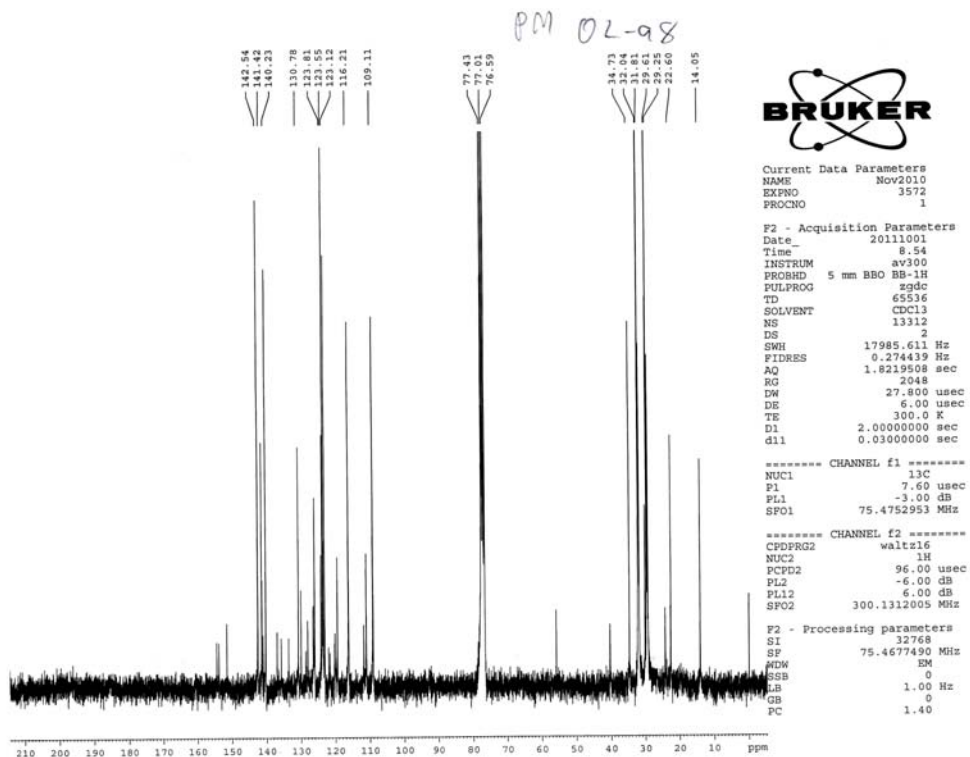

Compound 1c

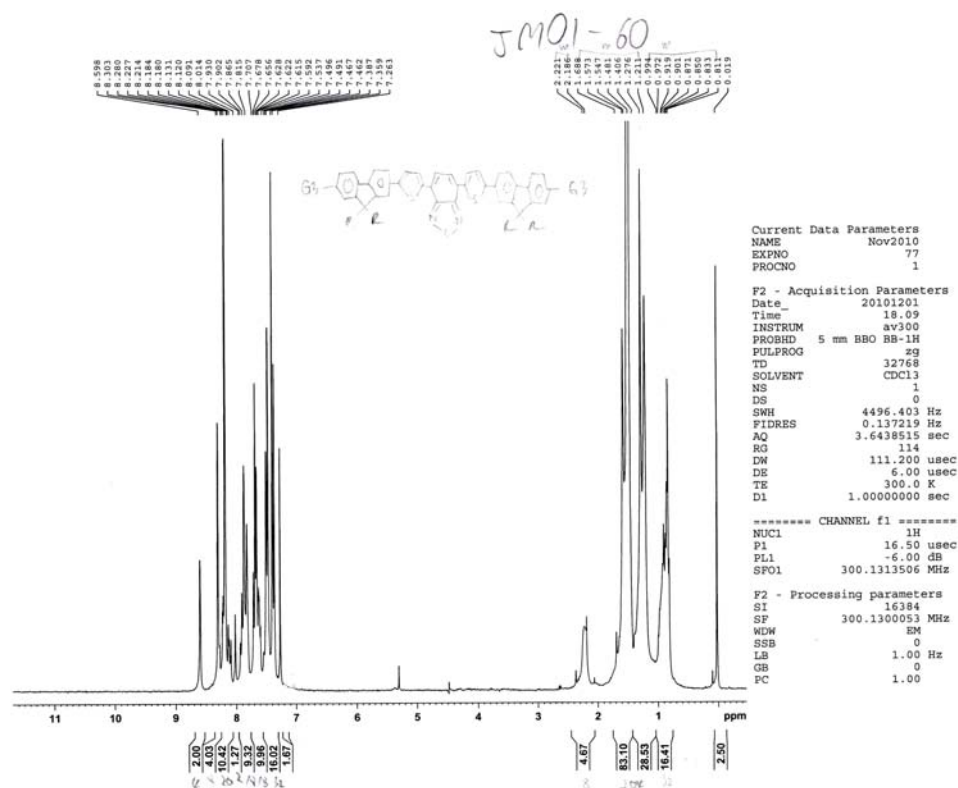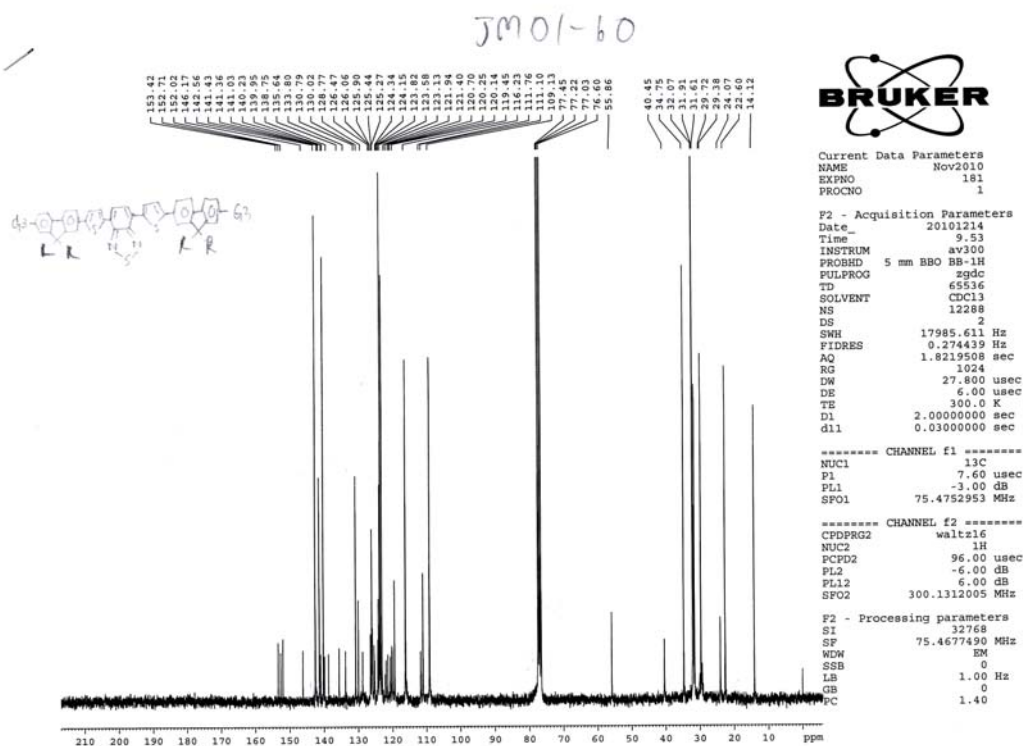

Supplement: c4py00228h1.pdf [file c4py00228h1.pdf]
